# Supplementary material for: Interaction between functionalized graphene and sulfur compounds in a lithium–sulfur battery – a density functional theory investigation
Source: PubMed Central journal article supplement (PMC9077337; doi:10.1039/c7ra11628d), 2018-01-09
Supplement: RA-008-C7RA11628D-s001.pdf [file RA-008-C7RA11628D-s001.pdf]

Supporting Information for

## Interaction between functionalized graphene and sulfur compounds in lithium-sulfur battery – a density functional theory investigation

Kimal Chandula Wasalathilake<sup>a</sup>, Md Roknuzzaman<sup>a</sup>, Kostya (Ken) Ostrikov<sup>a</sup>, Godwin A. Ayoko<sup>a</sup> and Cheng Yan<sup>\*a</sup>

<sup>a</sup>School of Chemistry, Physics and Mechanical Engineering, Faculty of Science and Engineering, Queensland University of Technology (QUT), Brisbane, QLD 4001, Australia

\*Email: c2.yan@qut.edu.au

(a)

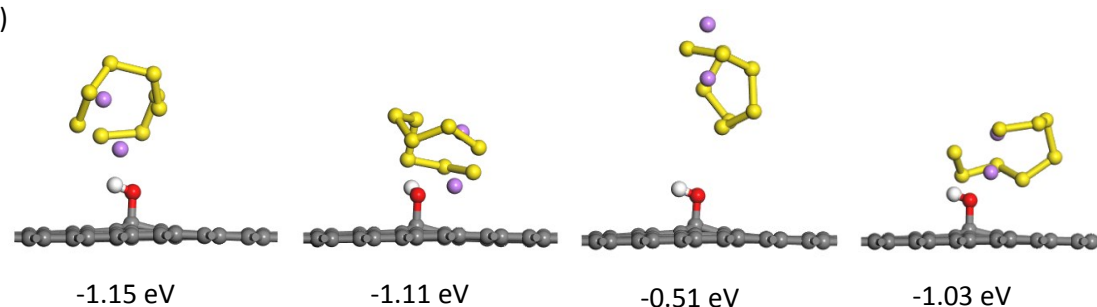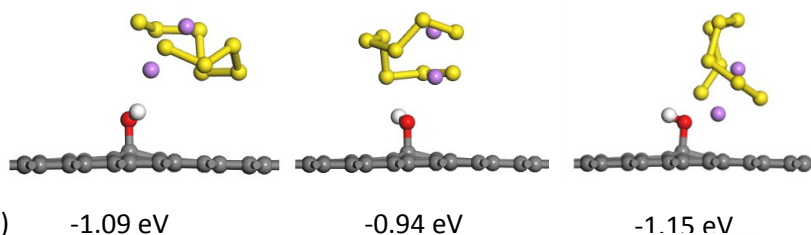

(b)

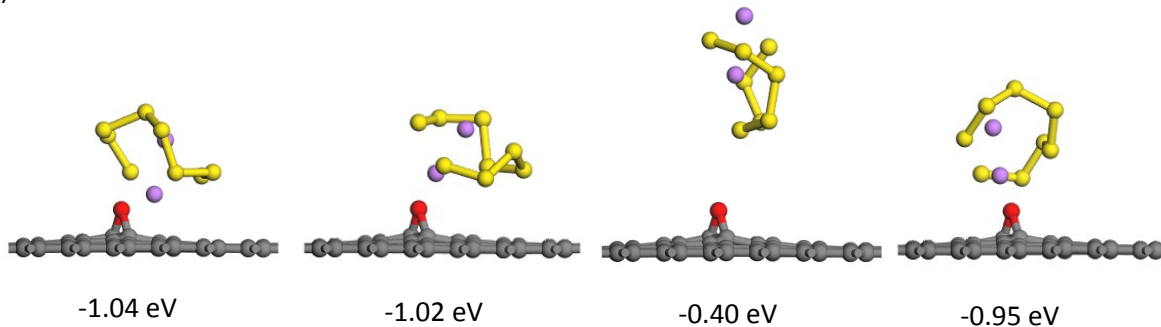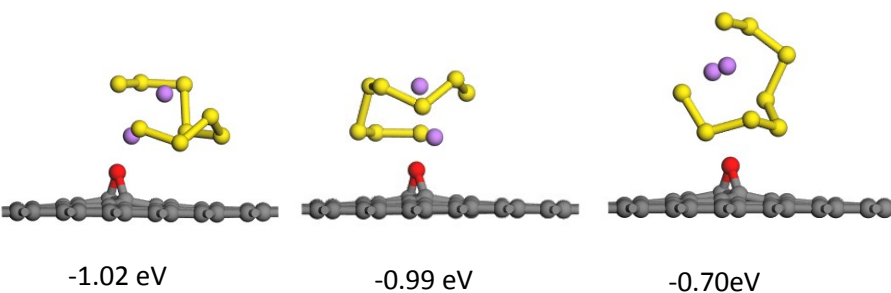

(c)

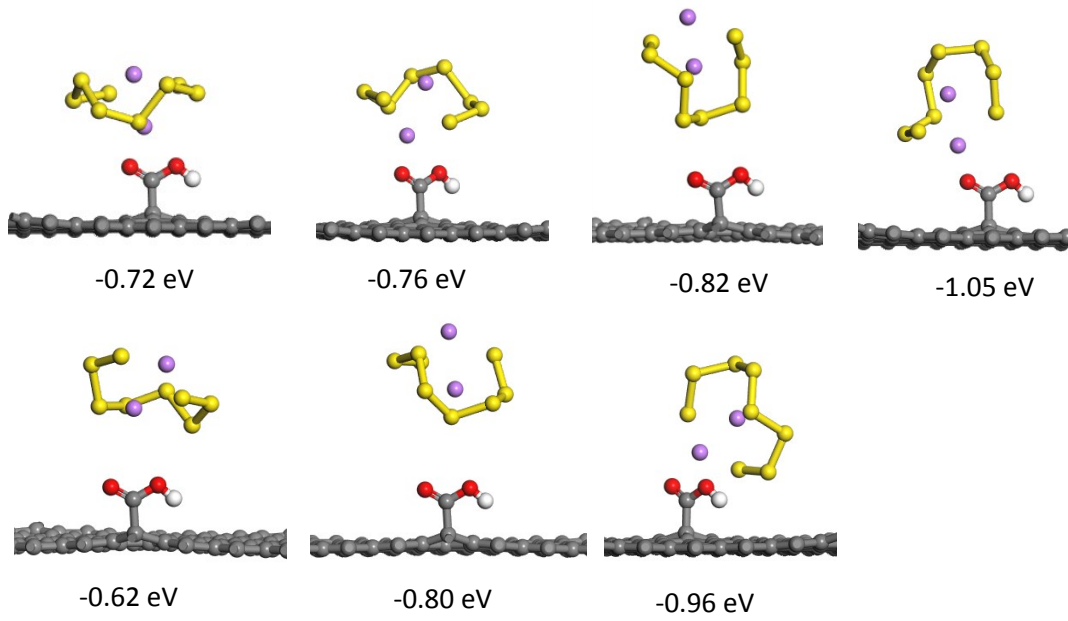

(d)

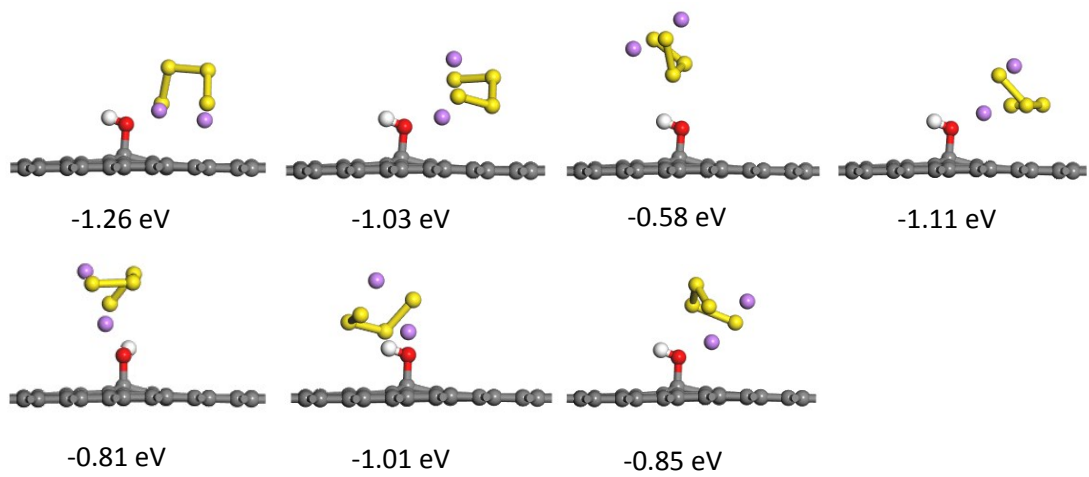

(e)

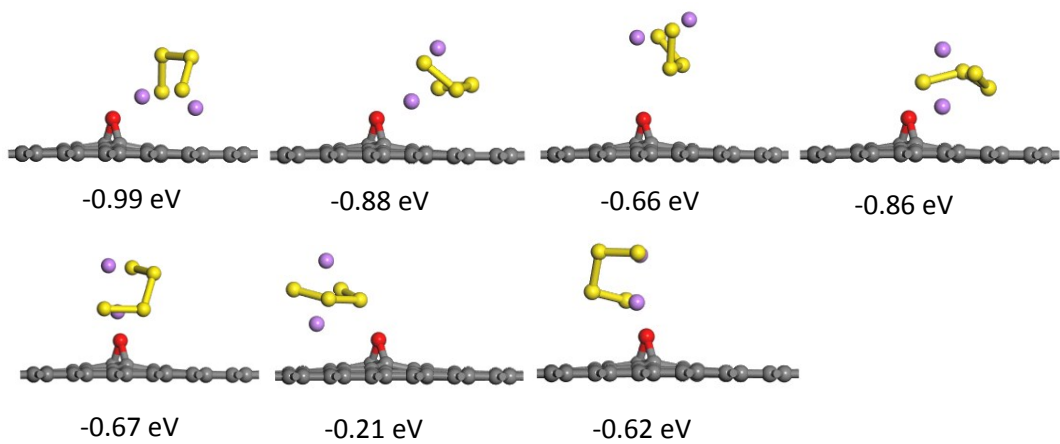

(f)

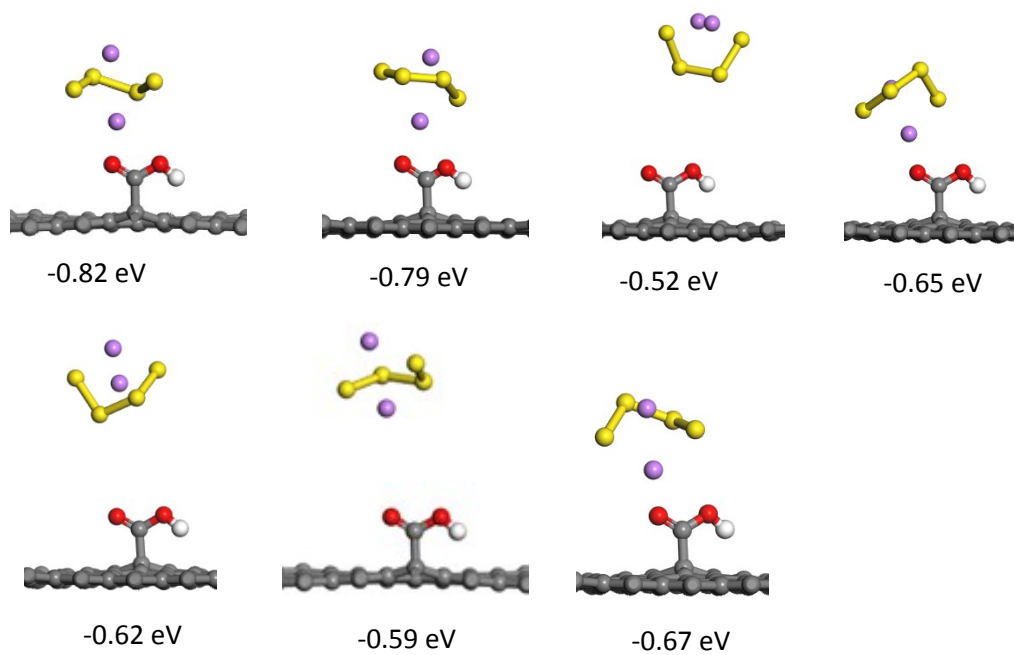

Fig. S1 Different configurations and corresponding adsorption energies of  $\text{Li}_2\text{S}_8$  and  $\text{Li}_2\text{S}_4$  on hG (a,d), eG (b,e) and cG (c,f)

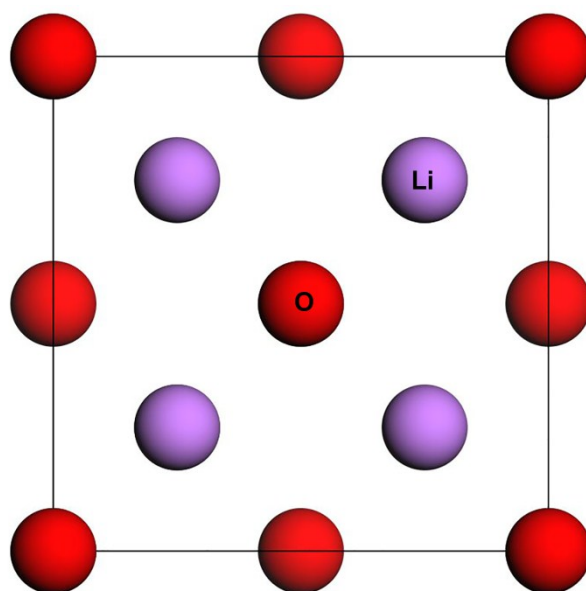

Fig. S2 Optimized structure of  $\text{Li}_2\text{O}$

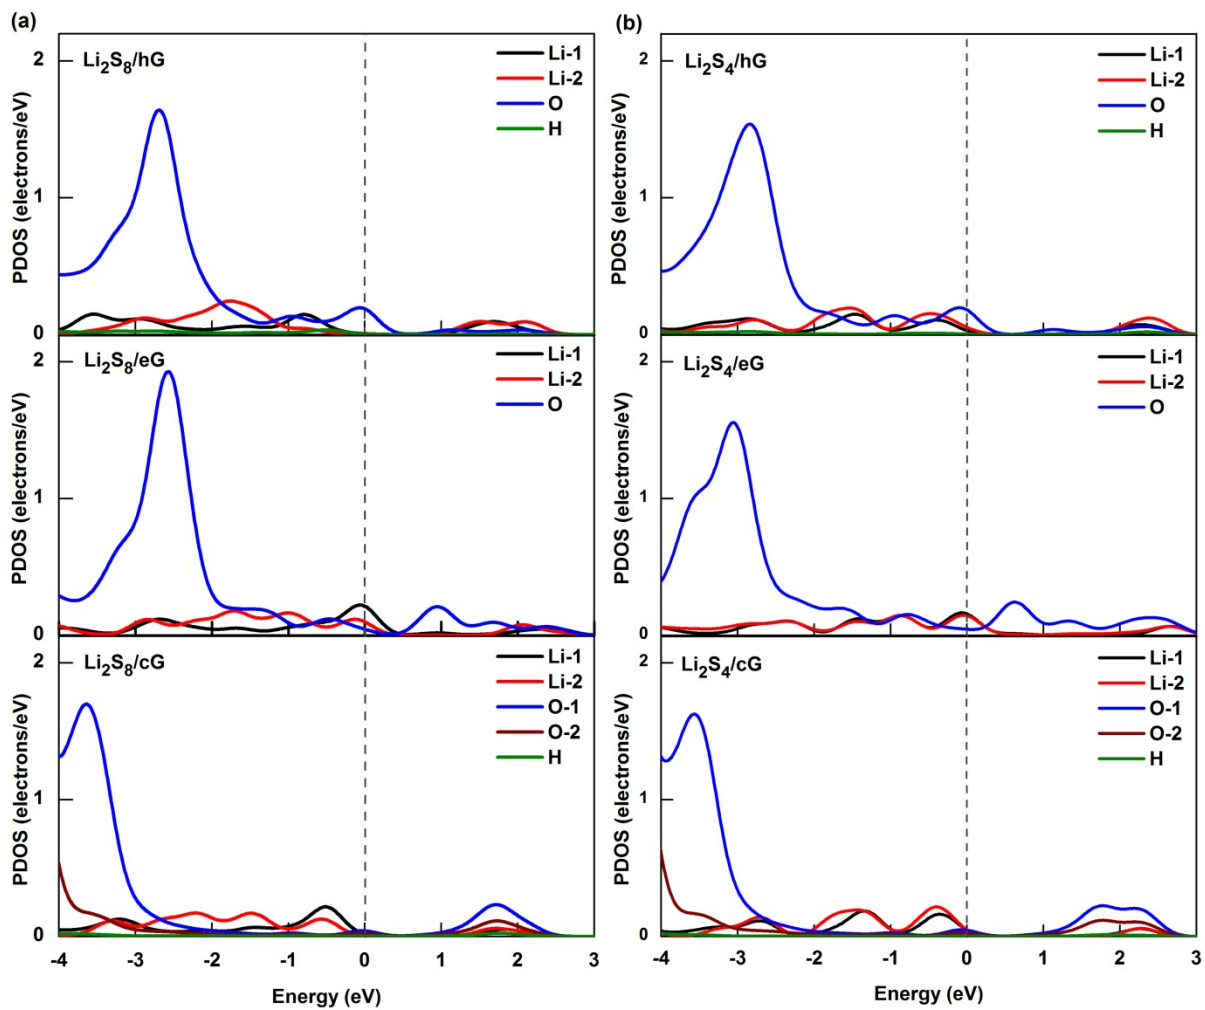

Fig. S3 Atomic partial density of states near the Fermi energy region for (a)  $\text{Li}_2\text{S}_8$  and (b)  $\text{Li}_2\text{S}_4$  on hG, eG and cG

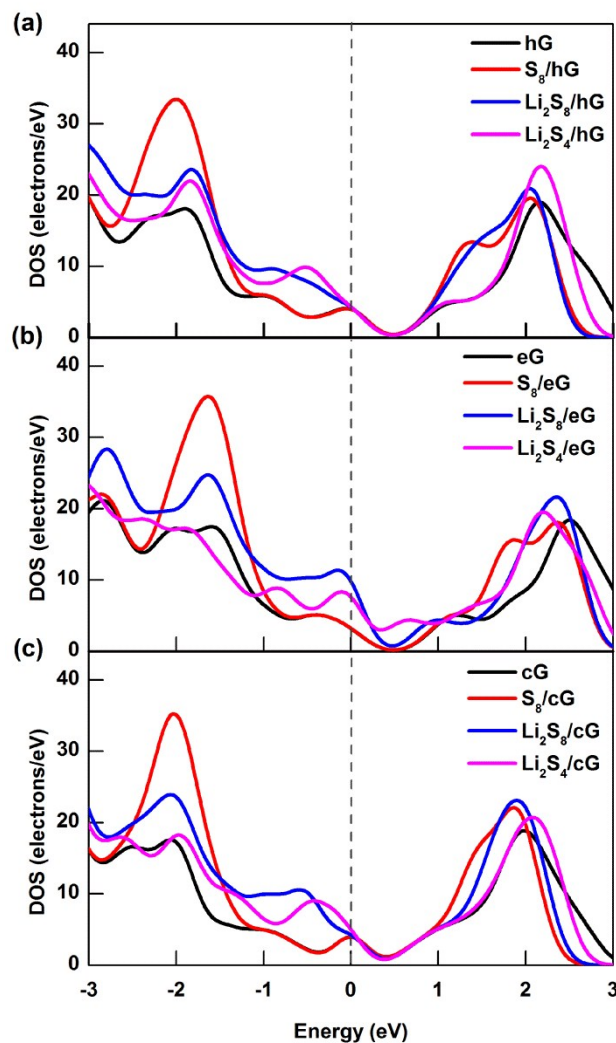

Fig. S4 Total density of states near the Fermi energy region for S<sub>8</sub>, Li<sub>2</sub>S<sub>8</sub> and Li<sub>2</sub>S<sub>4</sub> on a) hG, b) eG and c) cG

Table S1 Energy components related to adsorption energies of S<sub>8</sub>, Li<sub>2</sub>S<sub>8</sub> and Li<sub>2</sub>S<sub>4</sub> to microporous graphene

| Pore Size (Å) | $E_{\text{graphene}}$ (eV) | $E_S$ where $S = S_8$ (eV)                   | $E_{\text{Total}}$ (eV) | $E_{\text{ads}}$ (eV) |
|---------------|----------------------------|----------------------------------------------|-------------------------|-----------------------|
| 7.5           | -74621.756                 | -86654.006                                   | -161276.987             | -1.22                 |
| 10            | -74621.601                 | -86654.006                                   | -161276.332             | -0.71                 |
| 12.5          | -74621.595                 | -86654.006                                   | -161276.244             | -0.64                 |
| 15            | -74621.584                 | -86654.006                                   | -161276.210             | -0.62                 |
| 17.5          | -74621.525                 | -86654.006                                   | -161276.126             | -0.60                 |
| 20            | -74621.516                 | -86654.006                                   | -161276.118             | -0.60                 |
| Pore Size (Å) | $E_{\text{graphene}}$ (eV) | $E_S$ where $S = \text{Li}_2\text{S}_8$ (eV) | $E_{\text{Total}}$ (eV) | $E_{\text{ads}}$ (eV) |
| 7.5           | -74621.756                 | -87066.246                                   | -161689.556             | -1.55                 |
| 10            | -74621.601                 | -87066.246                                   | -161688.871             | -1.02                 |
| 12.5          | -74621.595                 | -87066.246                                   | -161688.825             | -0.98                 |
| 15            | -74621.584                 | -87066.246                                   | -161688.726             | -0.90                 |
| 17.5          | -74621.525                 | -87066.246                                   | -161688.667             | -0.90                 |
| 20            | -74621.516                 | -87066.246                                   | -161688.496             | -0.73                 |

| Pore Size (Å) | $E_{\text{graphene}}$ (eV) | $E_S$ where $S = \text{Li}_2\text{S}_8$ (eV) | $E_{\text{Total}}$ (eV) | $E_{\text{ads}}$ (eV) |
|---------------|----------------------------|----------------------------------------------|-------------------------|-----------------------|
| 7.5           | -74621.756                 | -87066.246                                   | -161689.556             | -1.55                 |
| 10            | -74621.601                 | -87066.246                                   | -161688.871             | -1.02                 |
| 12.5          | -74621.595                 | -87066.246                                   | -161688.825             | -0.98                 |
| 15            | -74621.584                 | -87066.246                                   | -161688.726             | -0.90                 |
| 17.5          | -74621.525                 | -87066.246                                   | -161688.667             | -0.90                 |
| 20            | -74621.516                 | -87066.246                                   | -161688.496             | -0.73                 |

Table S2 Summary of adsorption energies between different substrates and S species

| Substrate | Adsorption Energy (eV) |                         |                         |
|-----------|------------------------|-------------------------|-------------------------|
|           | $\text{S}_8$           | $\text{Li}_2\text{S}_8$ | $\text{Li}_2\text{S}_4$ |
| Graphene  | -0.64                  | -0.93                   | -0.74                   |
| hG        | -0.63                  | -1.23                   | -1.43                   |
| eG        | -0.63                  | -1.08                   | -1.07                   |
| cG        | -0.65                  | -1.29                   | -0.95                   |

Table S3 Total DOS value at  $E_f$  of Sulfur species in different substrates

| Species                           | Total DOS value at $E_f$<br>(electrons/eV) |
|-----------------------------------|--------------------------------------------|
| $\text{S}_8$ /Graphene            | 4.32665                                    |
| $\text{Li}_2\text{S}_8$ /Graphene | 9.33993                                    |
| $\text{Li}_2\text{S}_4$ /Graphene | 6.48636                                    |
| hG                                | 3.98315                                    |
| $\text{S}_8$ /hG                  | 3.99742                                    |
| $\text{Li}_2\text{S}_8$ /hG       | 4.23578                                    |
| $\text{Li}_2\text{S}_4$ /hG       | 4.30917                                    |
| eG                                | 3.15841                                    |
| $\text{S}_8$ /eG                  | 3.14733                                    |
| $\text{Li}_2\text{S}_8$ /eG       | 9.82511                                    |
| $\text{Li}_2\text{S}_4$ /eG       | 7.54303                                    |
| cG                                | 3.91877                                    |
| $\text{S}_8$ /cG                  | 3.91533                                    |
| $\text{Li}_2\text{S}_8$ /cG       | 4.24859                                    |
| $\text{Li}_2\text{S}_4$ /cG       | 4.93481                                    |

Table S4 Bond lengths after adsorption

|                   | $\text{Li}_2\text{S}_8$ -hG | $\text{Li}_2\text{S}_8$ -eG | $\text{Li}_2\text{S}_8$ -cG | $\text{Li}_2\text{S}_4$ -hG | $\text{Li}_2\text{S}_4$ -eG | $\text{Li}_2\text{S}_4$ -cG |
|-------------------|-----------------------------|-----------------------------|-----------------------------|-----------------------------|-----------------------------|-----------------------------|
| Li-O distance (Å) | 1.869                       | 1.958                       | 1.988                       | 1.993                       | 2.010                       | 1.979                       |
| Li-S distance     | 2.476                       | 2.477                       | 2.476                       | 2.463                       | 2.449                       | 2.435                       |
